# Supplementary material for: Molybdenum-modified mesoporous SiO2 as an efficient Lewis acid catalyst for the acetylation of alcohols
Source: Royal Society of Chemistry journal article supplement (doi:10.1039/d1ra02134f), 2021-01-01
Supplement: d1ra02134f1.pdf [file d1ra02134f1.pdf]

**Molybdenum-modified mesoporous SiO<sub>2</sub> as an efficient Lewis acid catalyst  
for the acetylation of alcohols.**

Xolani S. Hlatshwayo, Matumuene Joe Ndolomingo, Ndzondelelo Bingwa\*, and Reinout Meijboom\*

*Center for Synthesis and Catalysis, Department of Chemical Sciences, University of Johannesburg, P.O. Box 524, Auckland Park, 2006 Johannesburg, South Africa. Tel.: +27 (0)11 559 2367. Fax: +27 (0)11 559 2819.*

*E-mail: rmeijboom@uj.ac.za*

**SUPPLEMENTARY INFORMATION**

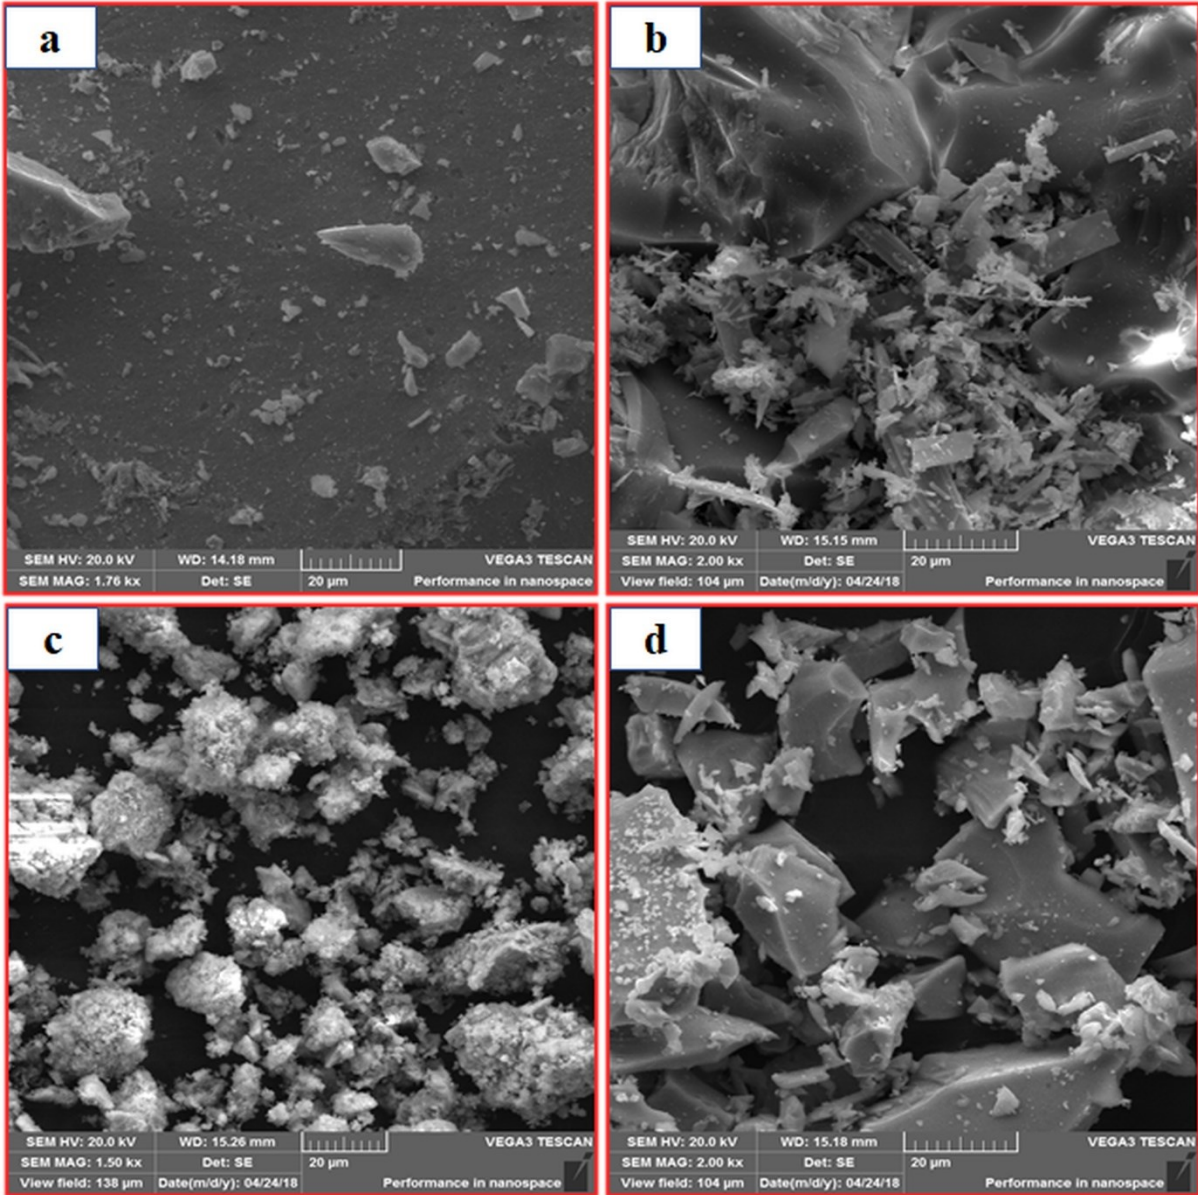

Figure S1. Scanning electron microscopy images (a) 5%WO<sub>3</sub>-ZrO<sub>2</sub>, (b) 5%MoO<sub>3</sub>-SiO<sub>2</sub>, (c) 5%MoO<sub>3</sub>-ZrO<sub>2</sub>, and (d) 5%WO<sub>3</sub>-SiO<sub>2</sub>.

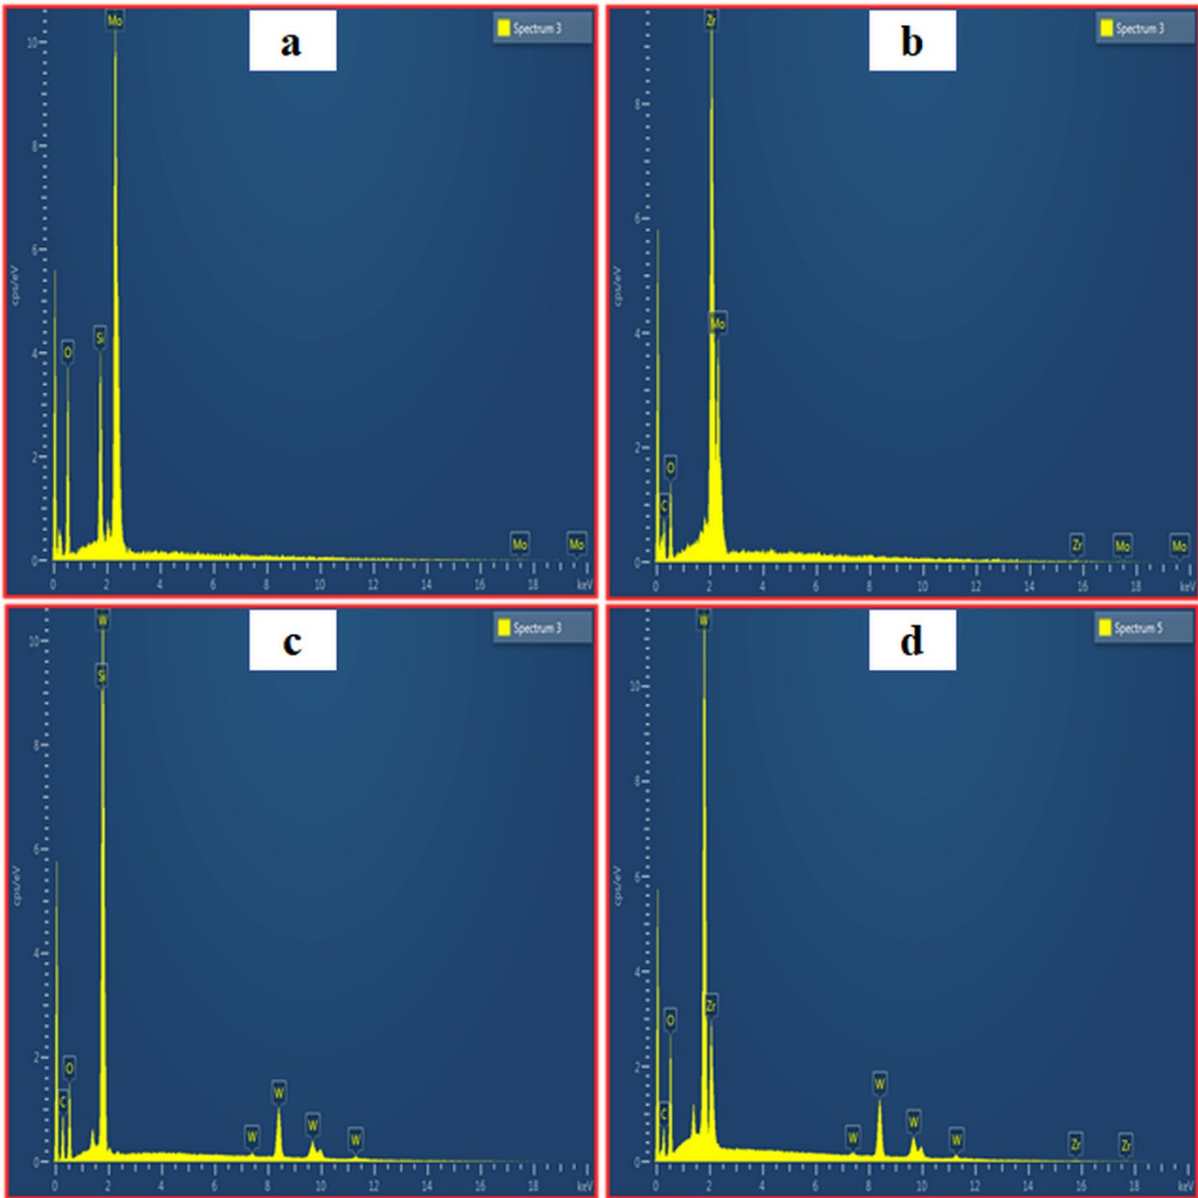

Figure S2. EDX spectrums of (a) 5%MoO<sub>3</sub>-SiO<sub>2</sub>, (b) 5%MoO<sub>3</sub>-ZrO<sub>2</sub>, (c) 5%WO<sub>3</sub>-SiO<sub>2</sub>, and (d) 5%WO<sub>3</sub>-ZrO<sub>2</sub>.

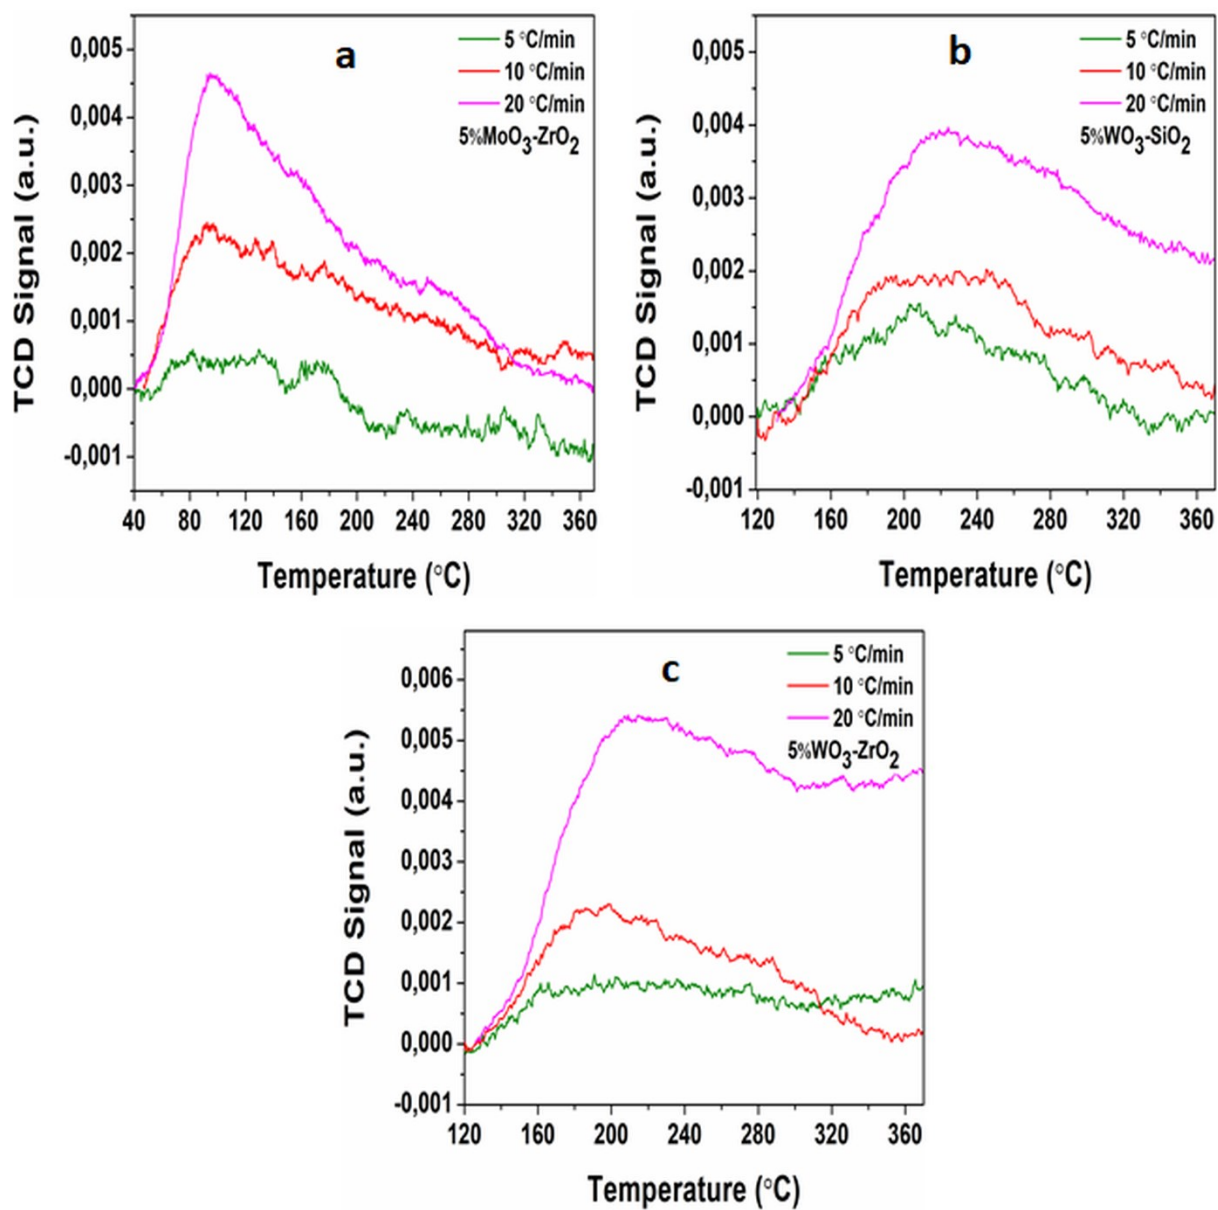

Figure S3.  $\text{NH}_3$ -TPD of (a) 5% $\text{MoO}_3$ - $\text{ZrO}_2$ , (b) 5% $\text{WO}_3$ - $\text{SiO}_2$ , and (c) 5% $\text{WO}_3$ - $\text{ZrO}_2$ .

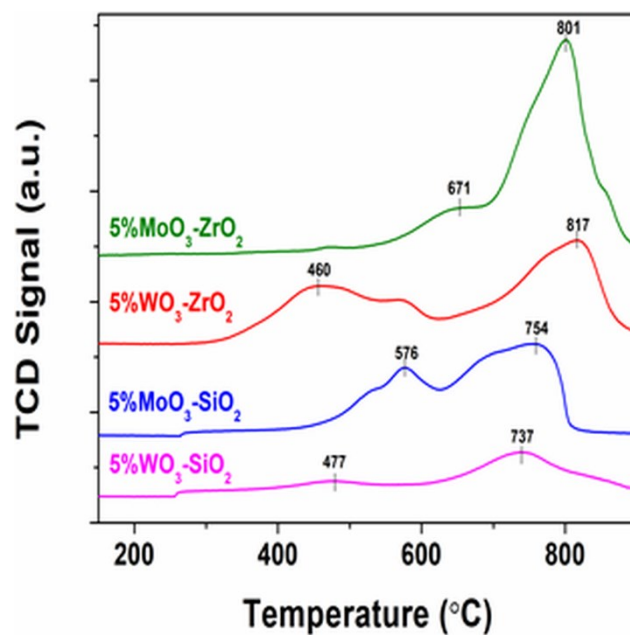

Figure S4. TPR of the synthesized solid Lewis acid catalysts.

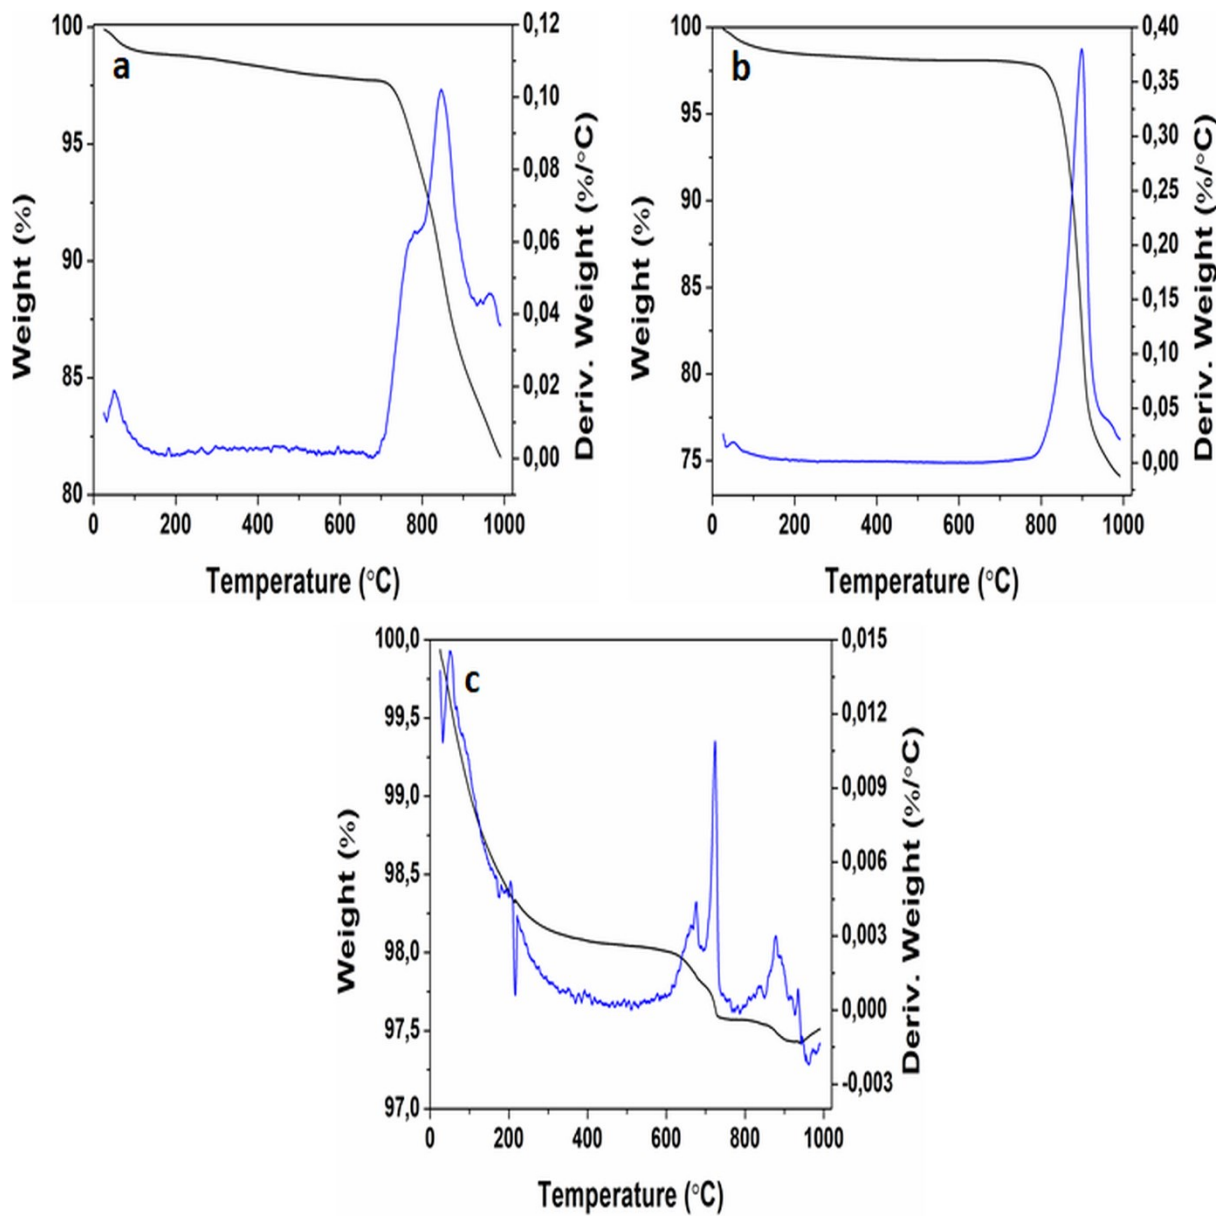

Figure S5. Thermogravimetric analysis and their derivatives: (a) 5%WO<sub>3</sub>-SiO<sub>2</sub>, (b) 5%WO<sub>3</sub>-ZrO<sub>2</sub>, and (c) 5%MoO<sub>3</sub>-ZrO<sub>2</sub>.
